# Supplementary material for: Identification of prognostic immune genes in laryngeal cancer
Source: PubMed Central journal article supplement — J Int Med Res. 2020 Nov 4;48(11):0300060520964662. doi: 10.1177/0300060520964662 (PMC7645519; doi:10.1177/0300060520964662), 2020-11-04
Supplement: sj-pdf-1-imr-10.1177_0300060520964662.pdf [file sj-pdf-1-imr-10.1177_0300060520964662.pdf]

1 **Table S1.** Correlation analysis between transcription factors and immune genes.

| TF    | Immune Gene | Cor      | p-value  | Regulation |
|-------|-------------|----------|----------|------------|
| BATF  | XCL2        | 0.424516 | 3.43E-06 | positive   |
| BATF  | TNFRSF4     | 0.601698 | 2.87E-12 | positive   |
| BATF  | LCK         | 0.512234 | 9.10E-09 | positive   |
| BATF  | ZAP70       | 0.637383 | 5.41E-14 | positive   |
| BATF  | TRBC1       | 0.588121 | 1.14E-11 | positive   |
| BATF  | TRBJ2-3     | 0.431588 | 2.25E-06 | positive   |
| BRCA1 | TFRC        | 0.408153 | 8.72E-06 | positive   |
| CBX2  | TFRC        | 0.460781 | 3.60E-07 | positive   |
| CBX2  | CYSLTR2     | 0.481622 | 8.73E-08 | positive   |
| CBX8  | AHNAK       | -0.41835 | 4.90E-06 | negative   |
| E2F7  | TFRC        | 0.478171 | 1.11E-07 | positive   |
| EPO   | EPO         | 1        | 0        | positive   |
| ETS1  | AHNAK       | 0.534818 | 1.48E-09 | positive   |
| ETS1  | AQP9        | 0.458408 | 4.21E-07 | positive   |
| ETS1  | PROK2       | 0.516409 | 6.57E-09 | positive   |
| ETS1  | FPR2        | 0.549834 | 4.10E-10 | positive   |
| ETS1  | IL13RA2     | 0.468028 | 2.22E-07 | positive   |
| FOXP3 | CCL2        | 0.485323 | 6.72E-08 | positive   |
| FOXP3 | CYSLTR2     | 0.413787 | 6.36E-06 | positive   |

|         |          |          |          |          |
|---------|----------|----------|----------|----------|
| FOXP3   | TNFRSF4  | 0.528236 | 2.55E-09 | positive |
| FOXP3   | LCK      | 0.421399 | 4.11E-06 | positive |
| FOXP3   | TRBC1    | 0.651512 | 9.70E-15 | positive |
| HEY1    | TFRC     | 0.434745 | 1.86E-06 | positive |
| HOXB7   | RBP1     | 0.420537 | 4.32E-06 | positive |
| IRF3    | AHNAK    | -0.41772 | 5.08E-06 | negative |
| IRF3    | TNFRSF25 | 0.491935 | 4.18E-08 | positive |
| IRF4    | LCK      | 0.439471 | 1.40E-06 | positive |
| IRF4    | TRBC1    | 0.625879 | 2.06E-13 | positive |
| IRF4    | TRBJ2-3  | 0.46984  | 1.97E-07 | positive |
| KAT2B   | TRBC1    | 0.444093 | 1.05E-06 | positive |
| LEF1    | TFRC     | 0.453283 | 5.86E-07 | positive |
| LEF1    | PPARG    | 0.42827  | 2.75E-06 | positive |
| PAX5    | LCK      | 0.525846 | 3.09E-09 | positive |
| PAX5    | TRBC1    | 0.628142 | 1.59E-13 | positive |
| PAX5    | TRBJ2-3  | 0.538738 | 1.07E-09 | positive |
| PPARG   | TFRC     | 0.515169 | 7.24E-09 | positive |
| PPARG   | PPARG    | 1        | 0        | positive |
| SOX4    | LCK      | 0.407428 | 9.08E-06 | positive |
| TBL1XR1 | TFRC     | 0.569743 | 6.75E-11 | positive |
| TP63    | TFRC     | 0.544433 | 6.55E-10 | positive |
| TP63    | PPARG    | 0.475191 | 1.37E-07 | positive |

|      |          |          |          |          |
|------|----------|----------|----------|----------|
| USF1 | AHNAK    | -0.47708 | 1.20E-07 | negative |
| USF1 | TNFRSF25 | 0.457628 | 4.43E-07 | postive  |

---

2 TF: transcription factors; Cor: Pearson's correlation coefficient
