# Supplementary material for: Identification of prognostic immune genes in laryngeal cancer
Source: PubMed Central journal article supplement — J Int Med Res. 2020 Nov 4;48(11):0300060520964662. doi: 10.1177/0300060520964662 (PMC7645519; doi:10.1177/0300060520964662), 2020-11-04
Supplement: sj-pdf-2-imr-10.1177_0300060520964662.pdf [file sj-pdf-2-imr-10.1177_0300060520964662.pdf]

1 **Table S2.** Upregulated and downregulated prognosis-associated genes.

| Upregulated   |        |          |          |
|---------------|--------|----------|----------|
| Gene          | logFC  | p-Value  | FDR      |
| PAEP          | 4.525  | 2.91E-06 | 3.41E-05 |
| EPO           | 4.169  | 8.60E-06 | 7.04E-05 |
| STC2          | 4.148  | 2.54E-08 | 7.34E-06 |
| AQP9          | 3.696  | 4.22E-07 | 1.20E-05 |
| TNFRSF4       | 3.161  | 5.78E-08 | 7.34E-06 |
| RBP1          | 2.926  | 3.19E-06 | 3.62E-05 |
| FCGR3B        | 2.557  | 0.000438 | 0.00145  |
| FPR2          | 2.288  | 0.00224  | 0.00559  |
| CYSLTR2       | 2.231  | 6.06E-05 | 0.000304 |
| TLR2          | 1.394  | 9.64E-05 | 0.000436 |
| PLCG1         | 1.019  | 4.82E-07 | 1.29E-05 |
| Downregulated |        |          |          |
| AHNAK         | -1.121 | 3.25E-05 | 0.000189 |
| PPARG         | -1.438 | 2.59E-05 | 0.000160 |
| CCL2          | -1.450 | 0.0242   | 0.0411   |
| BTC           | -1.794 | 1.32E-06 | 2.10E-05 |
